# Supplementary material for: DNA-Protein Vaccination Strategy Does Not Protect from Challenge with African Swine Fever Virus Armenia 2007 Strain
Source: Vaccines (Basel). 2019 Jan 28;7(1):12. doi: 10.3390/vaccines7010012 (PMC6466342; doi:10.3390/vaccines7010012)
Supplement: Supplementary file 1 [file vaccines-07-00012-s001.pdf]

## Article

# DNA-Protein Vaccination Strategy Does Not Protect from Challenge with African Swine Fever Virus Armenia 2007 Strain

Sun-Young Sunwoo <sup>1,†</sup>, Daniel Pérez-Núñez <sup>2,†</sup>, Igor Morozov <sup>1</sup>, Elena G. Sánchez <sup>2</sup>, Natasha N. Gaudreault <sup>1</sup>, Jessie D. Trujillo <sup>1</sup>, Lina Mur <sup>1</sup>, Marisa Nogal <sup>2</sup>, Daniel Madden <sup>1</sup>, Kinga Urbaniak <sup>1</sup>, In Joong Kim <sup>1</sup>, Wenjun Ma <sup>1</sup>, Yolanda Revilla <sup>2,\*</sup>, Juergen A. Richt <sup>1,\*</sup>

<sup>1</sup> Department of Diagnostic Medicine & Pathobiology, College of Veterinary Medicine, Kansas State University, K2224 Mosier Hall, 1800 Denison Ave, Manhattan, KS 66506, USA; sunwoosy@gmail.com (S.-Y.S.); imorozov@vet.k-state.edu (I.M.); nng5757@vet.k-state.edu (N.N.G.); jdtrujillo@vet.k-state.edu (J.D.T.); linamurvet@gmail.com (L.M.); dwmadden@vet.k-state.edu (D.M.); kinia-u@wp.pl (K.U.); lui0125@gmail.com (I.J.K.); wma@vet.k-state.edu (W.M.)

<sup>2</sup> CBMSO-CSIC-UAM, C/Nicolás Cabrera 1, Campus de Cantoblanco, Madrid 28049, Spain; daniel\_perez@cbm.csic.es (D.P.-N.); elena\_garcia@cbm.csic.es (E.G.S.); marisa\_nogal@cbm.csic.es (M.N.)

\* Correspondence: jricht@vet.k-state.edu (J.A.R.); yrevilla@cbm.csic.es (Y.R.); Tel.: +1-785-532-2793 (J.A.R.); +34-91-196-4570 (Y.R.)

† These authors contribute equally to this paper.

## Supplementary Materials

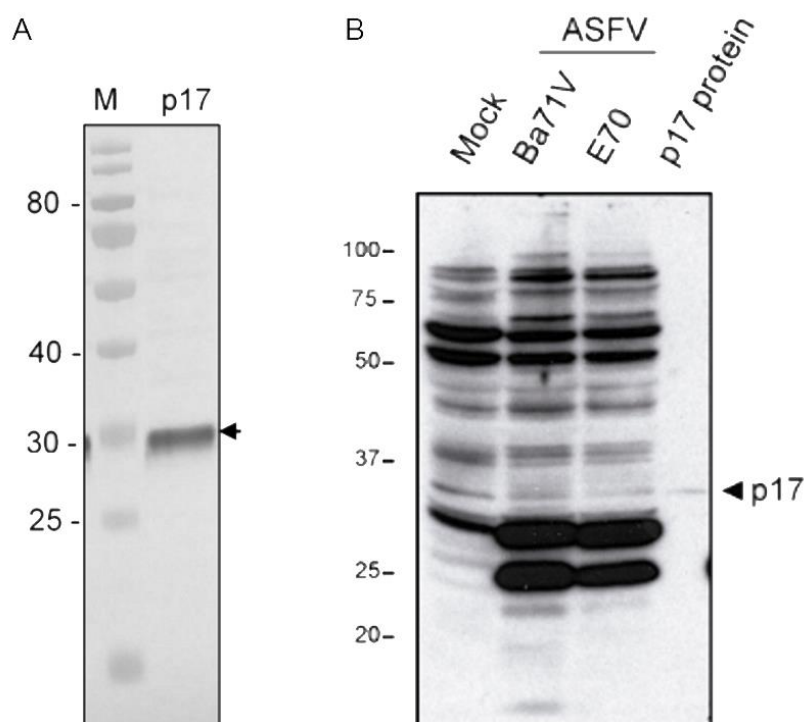

**Figure 1.** Western Blot of Recombinant viral protein p17 expression and recognition by hyperimmune swine serum. (A) Expression of recombinant p17 protein immunogen evaluated by western blot with anti-GST tag antibodies. (B) Expression of viral p17 protein from Vero or COS-7 cells infected with the respective Ba71V or E70 ASFV strains evaluated by western blot with serum from a pig in Group 2 immunized with the cocktail that included p17. Recombinant protein used to vaccinate swine in this study is in the last lane. M = protein ladder; kDa represented on the left.

**Table 1.** Clinical signs and scoring parameters.

| Clinical Signs         | Severity (scoring) |                                                       |                                                               |                                                                                                       |                |
|------------------------|--------------------|-------------------------------------------------------|---------------------------------------------------------------|-------------------------------------------------------------------------------------------------------|----------------|
|                        | 0                  | 1                                                     | 2                                                             | 3                                                                                                     | 4              |
| Liveliness             | No Abnormality     | Reduced liveliness, stands w/o help                   | Sluggish, stands with help                                    | Dormant, refusal to stand with or w/o help                                                            | Not used       |
| Body Shape             | No Abnormality     | Empty Stomach (sunken flanks)                         | Empty Stomach with weight loss indicators                     | Wasting (ribs, vertebrae visible, rough hair)                                                         | Not used       |
| Breathing              | No Abnormality     | Increased Respiratory Rate                            | Significantly increased respiratory rate, abdominal breathing | Difficult Breathing (open mouth breathing, wheezing coughing)                                         | Not used       |
| Neurological Signs     | No Abnormality     | Stumbling gait, quickly corrected                     | Ataxia/paresis of the hindquarters, continues to walk         | Paralysis of the hindquarters, unable to stand, convulsions                                           | Not used       |
| Skin                   | No Abnormality     | Red skin, cyanosis of the skin (<10%)                 | Cyanosis of the skin(10-25%), occasional skin bleeding        | Cyanosis of the skin (>25%), large blue/black spots, large subcutaneous bleeding, necrosis/ulceration | Not used       |
| Digestive Symptoms     | No Abnormality     | Diarrhea (<24 Hours)                                  | Diarrhea(>24hours), Occasional vomiting                       | Bloody diarrhea, frequent vomiting                                                                    | Not used       |
| Ocular/Nasal Discharge | No Abnormality     | Thin discharge from nose and/or eyes (w/o admixtures) | Thick discharge from nose and/or eyes (no blood)              | Bloody discharge from nose and/or eyes                                                                | Not used       |
| Fever                  | Temp of 38–39 °C   | Temp of $\geq$ to 40 °C                               | Temp of $\geq$ to 40°C for two sequential days                | Temp of $\geq$ to 41 °C                                                                               | Temp of <38 °C |

**Table 2.** Evaluation criteria for gross and histological pathology and score. Scoring was modified from Galindo-Cardiel et al. 2013.

|                       | Evaluation criteria and score                                                                                                                                                                                                                                                                                         |                        |
|-----------------------|-----------------------------------------------------------------------------------------------------------------------------------------------------------------------------------------------------------------------------------------------------------------------------------------------------------------------|------------------------|
|                       | Gross pathology                                                                                                                                                                                                                                                                                                       | Histological pathology |
| <b>Body condition</b> | Normal (0); Mild loss (1) vertebrae and pelvic bones detectable by firm palpation and ribs not overtly visible but palpable; Moderate loss (2) vertebrae and pelvic bones visible to prominent ribs visible; Severe loss of body condition (3) vertebrae and pelvic bone obvious with muscle wasting, prominent ribs. |                        |
| <b>Integument</b>     | Normal (0), pronounced hyperemia (1), petechia/ecchymosis (2), cyanosis/infarction (3).                                                                                                                                                                                                                               |                        |
| <b>Cardiovascular</b> | Subcutaneous/intramuscular/abdominal/articular central nervous system: hemorrhage and edema mild (1), moderate (2), severe (3).                                                                                                                                                                                       |                        |

|                           |                                                                                                                                                                                             |                                                                                                                                                                                                                                                                                                                                                                                                                                                                  |
|---------------------------|---------------------------------------------------------------------------------------------------------------------------------------------------------------------------------------------|------------------------------------------------------------------------------------------------------------------------------------------------------------------------------------------------------------------------------------------------------------------------------------------------------------------------------------------------------------------------------------------------------------------------------------------------------------------|
| <b>Liver</b>              | Hepatopathy (enhanced lobular pattern, intrahepatic mottling, congestion, texture (friability) and Bile duct and vascular hilus, edema and/or hemorrhage with prominent vasculature.        | 1) vascular/biliary changes: portal angiectasia and sinusoidal dilation, fibrin thrombi, bile duct hypertrophy/hyperplasia, 2) hepatopathy: portal and sinusoidal infiltrates or inflammatory cells, apoptosis and/ or necrosis of hepatocytes, kupffer cell hypertrophy, biliary epithelium, or portal vasculature.                                                                                                                                             |
| <b>Lung</b>               | 1) Pulmonary collapse or lack of it leading to rib impression formation, 2) edema, 3) congestion and or hemorrhage, 4) pneumonia and 5) the formation of pleural effusion or 6) hemorrhage. | 1) Interstitial and alveolar edema (less than 15% of sections affected are classified as mild, 15-30% as moderate and >30% as severe), 2) congestion with angiectasia, vasculopathy and hemorrhage (moderate and severe), 3) pneumonia characterized multifocal to coalescing inflammatory infiltrates within alveolar spaces and wall, peribronchiolar and perivascular.                                                                                        |
| <b>Spleen</b>             | 1) Congestion and/or hemorrhage and 2) texture/necrosis (spongy and friable) or infarction.                                                                                                 | Ratio of white pulp to red pulp (<1:4 as mild, 1:5 to 1:8 as moderate and >1:9 as severe. This includes when present represents an estimate of lymphoid depletion and hypertrophy of the reticulo-endothelial system, , 2) necrosis/ infarcts, 3) Lymphocytolysis: individual lymphoid or histiocytic cell necrosis/apoptosis, 4) vascular damage: angiectasia, red pulp congestion, hemorrhage, fibrinoid necrosis of vascular walls/ inflammatory infiltrates. |
| <b>Lymph nodes/tonsil</b> | 1) Edema, 2) congestion, 3) hemorrhage, 3) necrosis, 4) enlargement- swelling or nodular proliferation,                                                                                     |                                                                                                                                                                                                                                                                                                                                                                                                                                                                  |
| <b>Kidney</b>             | Congestion, hemorrhage and edema; multifocal, cortical, medullary, and/or subcapsular.                                                                                                      | Congestion, hemorrhage and edema within the medulla or cortex and interstitial inflammation and necrosis of the tubular epithelium with cast formation.                                                                                                                                                                                                                                                                                                          |
